# Supplementary material
Source: Elsevier journal article supplement (https://www.sciencedirect.com/science/article/pii/S2254887422000169)

Figure S1. Percentage of agreement on the Delphi statements (n = 291).

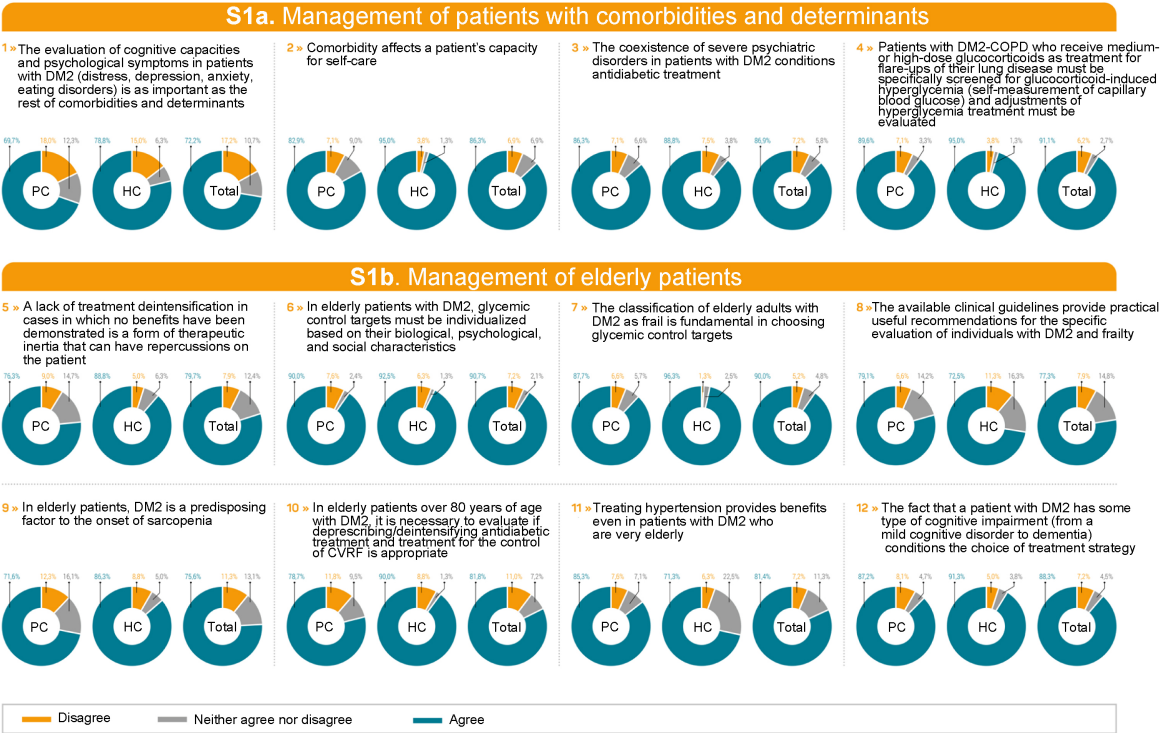

Figure S2. OAB questions on antidiabetic treatment deintensification (n = 296).

S2. What situations do you believe can be a reason for antidiabetic treatment deintensification once the risks and benefits have been evaluated?

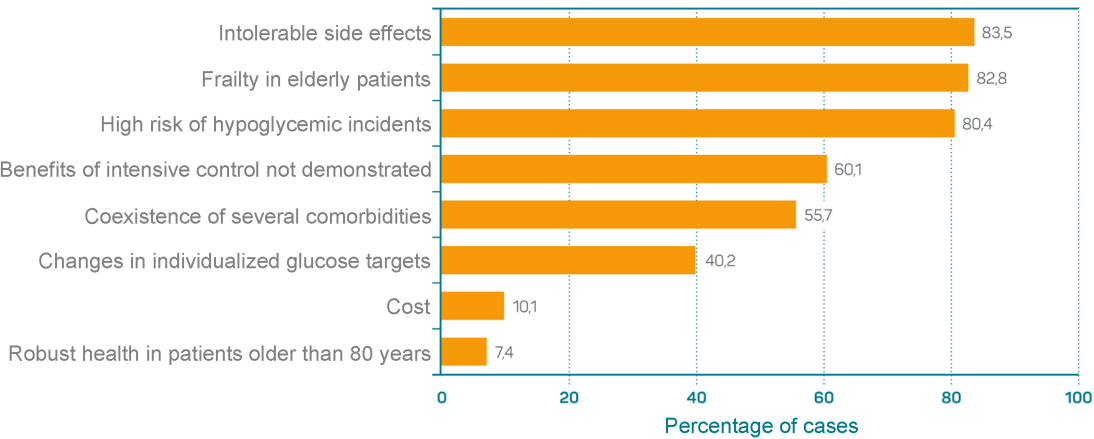

Figure S3. OAB question on the definition of elderly, frail patients (n = 296).

S3. What factors define an elderly patient as fragile?

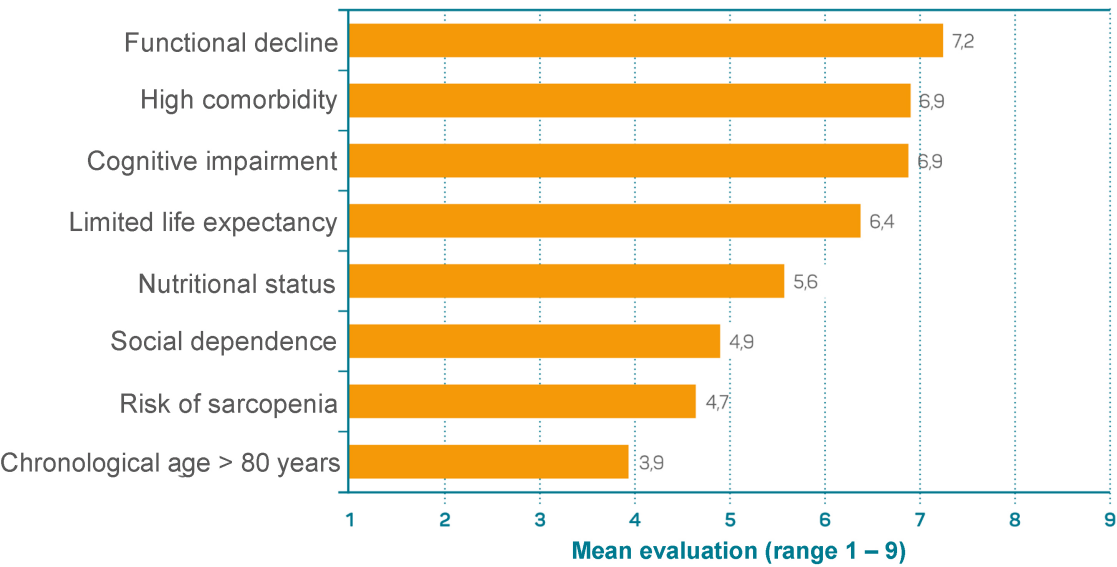

S4a. Do you know of or use any of the following tests to assess frailty in your routine practice?

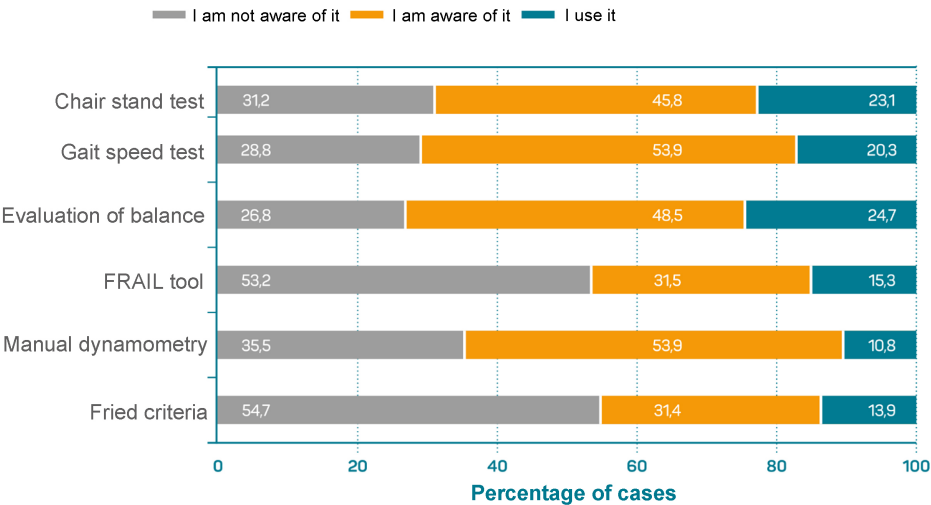

S4b. Do you know of or use any of the following tests to assess sarcopenia in your routine practice?

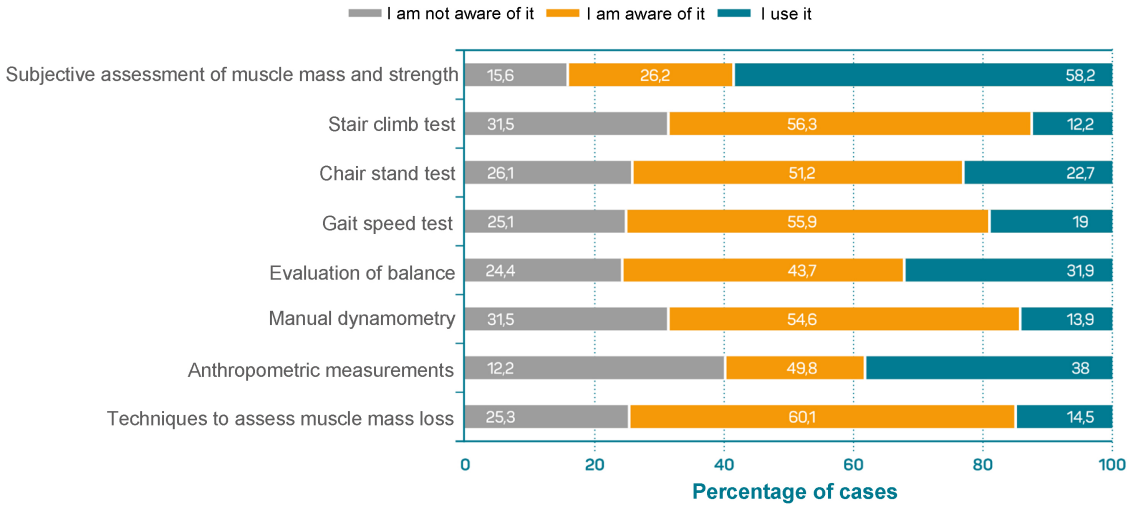

Supplement: mmc1 [file S2254887422000169:mmc1.pdf]
